# Supplementary material
Source: Springer Nature journal article supplement (https://www.springermedizin.de/resource/supplementary/12985_2010_889_MOESM1_ESM.pdf/9608672)

M

1

2

kDa

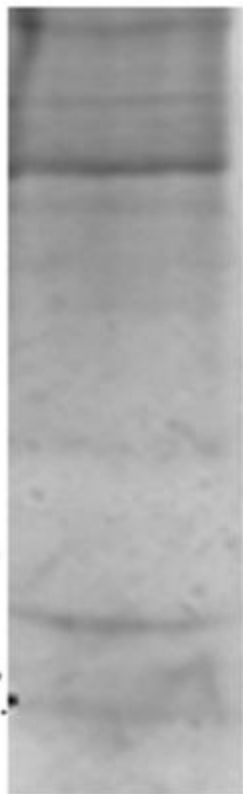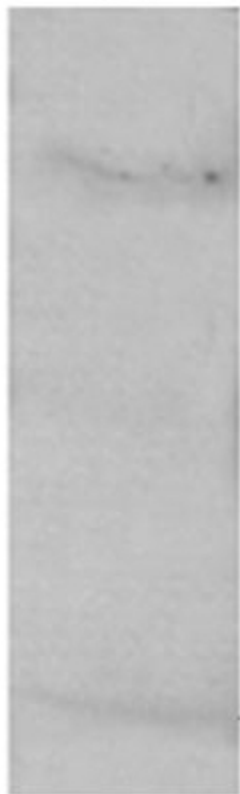

94 —

66.2 —

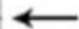

Supplement: MOESM1 [file 9608672]
